# Supplementary material for: Niche conservatism drives the elevational diversity gradient in major groups of free-living soil unicellular eukaryotes
Source: Research Square preprint supplement (doi:10.21203/rs.3.rs-133244/v1), 2020-12-21
Supplement: Supplementary file 1 [file a94406e3635ff36054a27e0a.docx]

**Supporting Information.** Fernández, L. D., C. V. W. Seppey, D. Singer, B. Fournier, D. Tatti, E. A. D. Mitchell, and E. Lara. 202X. Niche conservatism drives the elevational diversity gradient in major groups of free-living soil unicellular eukaryotes. Ecology.

**Appendix S4 Results obtained from a high-throughput sequencing approach**


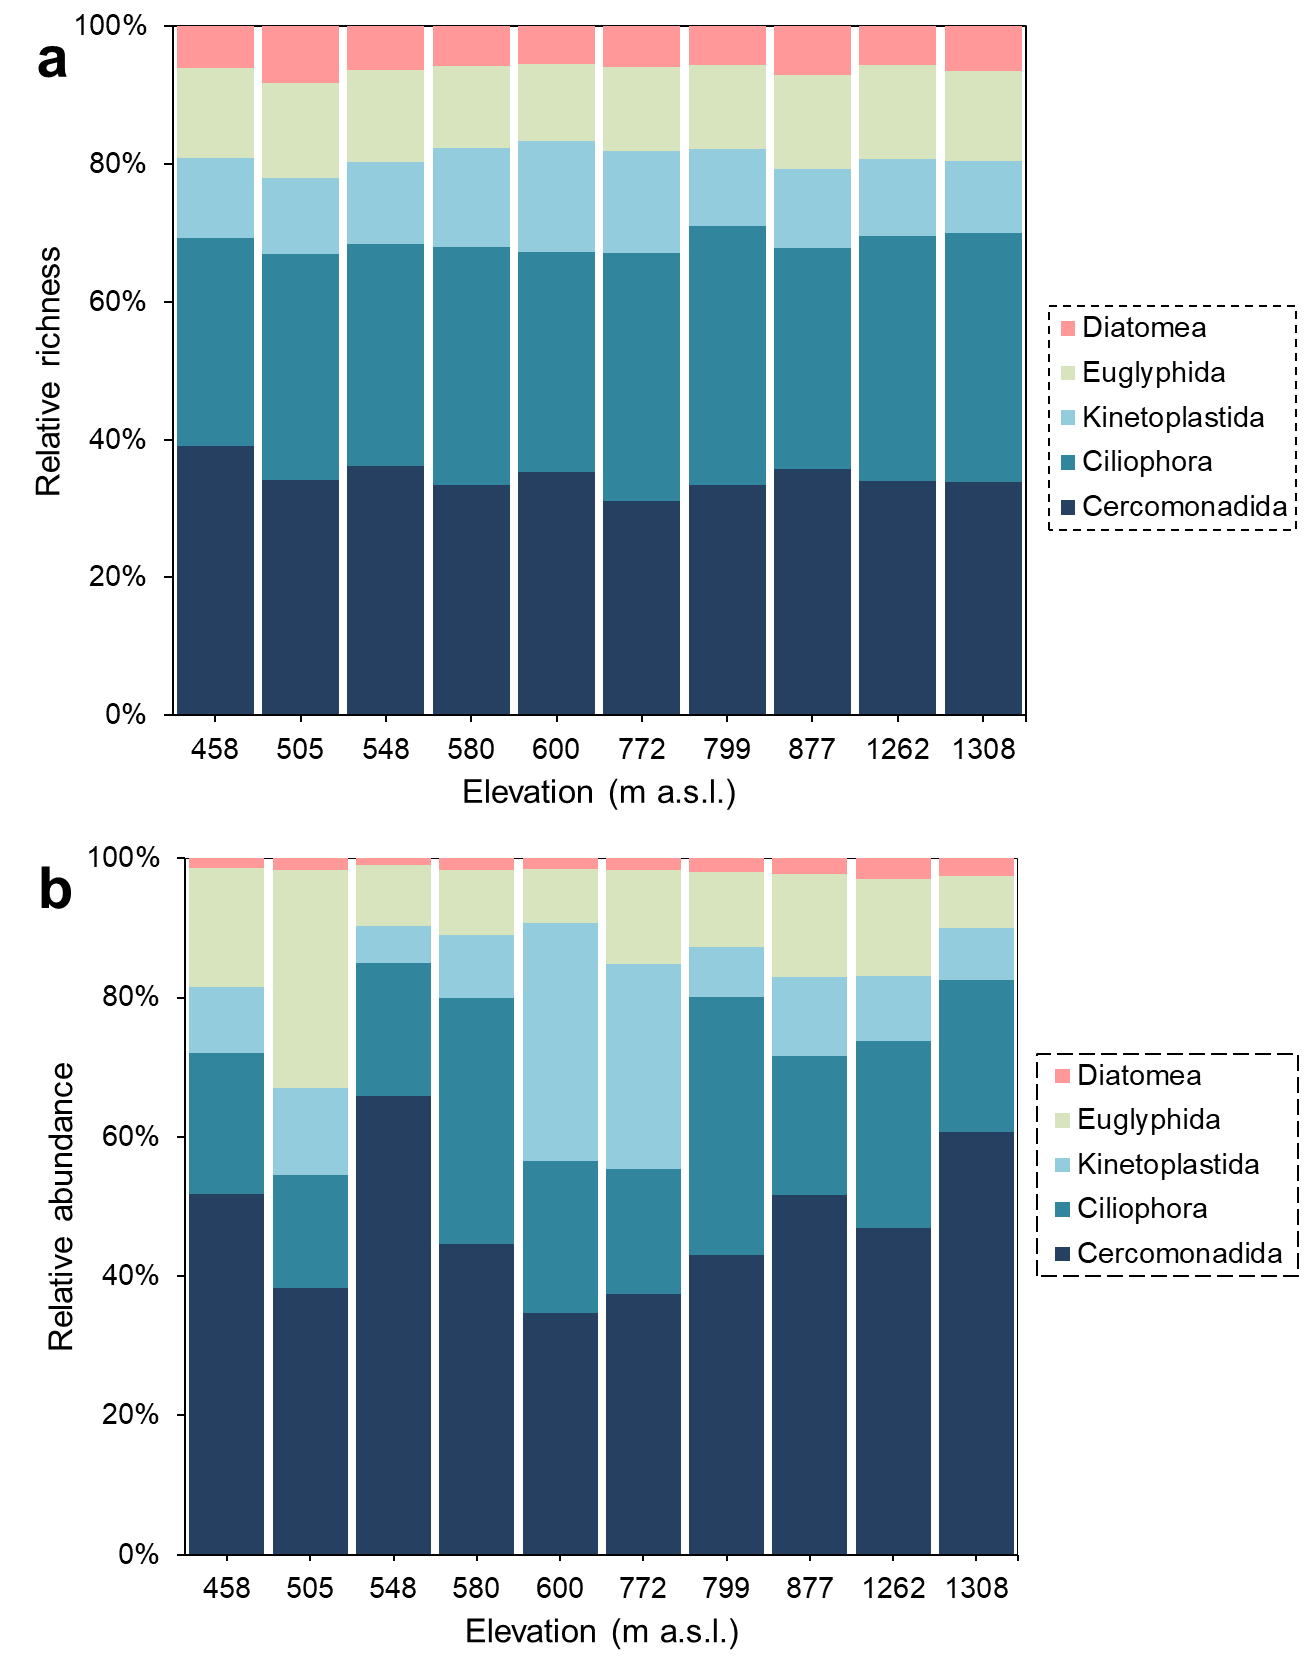


Fig. S1.Relative richness and abundance recorded for each eukaryotic microbial group studied at each elevational forest site.
